# Supplementary material
Source: publisher figshare collection journal article supplement (https://acs.figshare.com/ndownloader/files/3874261)
Supplement: Supplementary file 1 [file 3874261]

Supplemental Figure S5

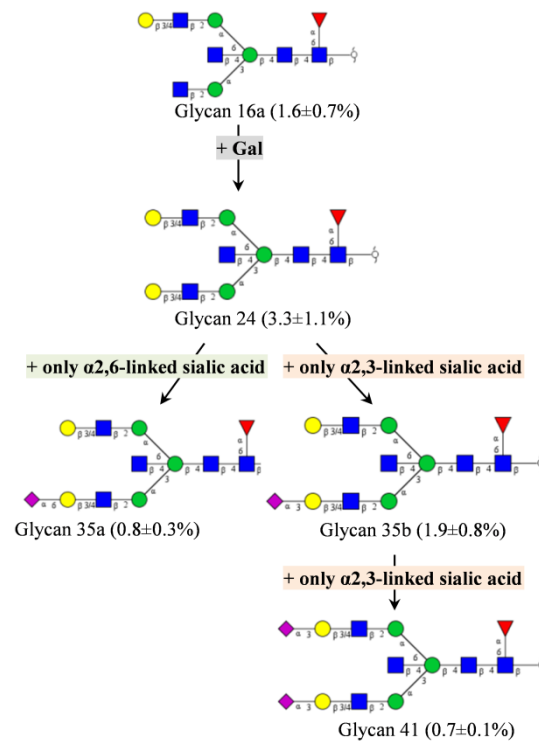

**Supplemental Figure S5 - Biosynthetic relationship between the five bisecting GlcNAc containing *N*-glycans in MDA157.** Five core-fucosylated bisecting GlcNAc containing *N*-glycans were detected in MDA157, The isomeric glycans 35a and 35b differed by their sialic acid linkages; the  $\alpha 2,3$ -linked sialylated structure was expressed at twice the level of the  $\alpha 2,6$ -linked isomer.
